# Supplementary material
Source: ML conference proceedings conference paper supplement (https://openaccess.thecvf.com/content/ICCV2021/html/Cui_Parametric_Contrastive_Learning_ICCV_2021_paper.html)
Supplement: Supplementary file 1 [file Cui_Parametric_Contrastive_Learning_ICCV_2021_supplemental.pdf]

# Parametric Contrastive Learning Supplementary Material

## A. Proof to Remark 1

For an image  $X_i$  and its label  $y_i$ , the expectation number of positive pairs with respect to  $X_i$  will be:

$$K_{y_i} = q(y_i) * (\text{length}(\text{queue}) + \text{batchsize} * 2 - 1) \approx \text{length}(\text{queue}) \cdot q(y_i), \quad (9)$$

$q(y_i)$  is the class frequency over the whole dataset. Here the " $\approx$ " establishes because  $\text{batchsize} \ll \text{length}(\text{queue})$  in training process. Note that we use such approximation just for simplification. Our analysis holds for the precise  $K_{y_i}$ . In what follows, we prove the optimal values for supervised contrastive loss.

Suppose training samples are i.i.d. To minimize the supervised contrastive loss for sample  $X_i$ , according to Eq. (3), we rewrite:

$$\begin{cases} P(i) = \{z_1^+, z_2^+, \dots, z_{K_{y_i}}^+\}; \\ p_i^+ = \frac{\exp(z_i^+ \cdot T(x_i))}{\sum_{z_k \in A(i)} \exp(z_k \cdot T(x_i))}; \\ p_{sum}^+ = p_1^+ + p_2^+ + \dots + p_{K_{y_i}}^+. \end{cases}$$

Then the supervised contrastive loss will be:

$$\begin{aligned} \mathcal{L}_i &= - \sum_{z_+ \in P(i)} \log \frac{\exp(z_+ \cdot T(x_i))}{\sum_{z_k \in A(i)} \exp(z_k \cdot T(x_i))} \\ &= -(\log p_1^+ + \log p_2^+ + \dots + \log p_{K_{y_i}}^+). \end{aligned}$$

For obtaining its optimal solution, we define the Lagrange multiplier form of  $\mathcal{L}_i$  as:

$$l = -(\log p_1^+ + \log p_2^+ + \dots + \log p_{K_{y_i}}^+) + \lambda(p_1^+ + p_2^+ + \dots + p_{K_{y_i}}^+ - p_{sum}^+), \quad (10)$$

where  $\lambda$  is the Lagrange multiplier. The first order conditions of Eq. (10) w.r.t.  $\lambda$  and  $p_i^+$  can be written as follows:

$$\begin{cases} \frac{\partial l}{\partial p_i^+} = -\frac{1}{p_i^+} + \lambda = 0; \\ \frac{\partial l}{\partial \lambda} = p_1^+ + p_2^+ + \dots + p_{K_{y_i}}^+ - p_{sum}^+ = 0. \end{cases} \quad (11)$$

From Eq. (11), the optimal solution for  $p_i^*$  will be  $\frac{p_{sum}^+}{K_{y_i}}$ . Note that  $p_{sum}^+ \in [0, 1]$ , with a specific  $p_{sum}^+$ , the minimal loss value of  $\mathcal{L}_i$  is:

$$\mathcal{L}_i = -K_{y_i} \log \frac{p_{sum}^+}{K_{y_i}}. \quad (12)$$

Thus, when  $p_{sum}^+ = 1.0$ ,  $\mathcal{L}_i$  achieves minimum with the optimal value  $p_i^+ = \frac{1}{K_{y_i}}$  which is exactly the probability that two samples of the same class are a true positive pair.

## B. Proof to Remark 2

For the image  $X_i$  and its label  $y_i$ , Eq. (9) still establishes for our parametric contrastive loss. To minimize the parametric contrastive loss for sample  $X_i$ , according to Eq. (4), we similarly rewrite:

$$\left\{ \begin{array}{l} P(i) = \{z_1^+, z_2^+, \dots, z_{K_{y_i}}^+\} \\ p_i^+ = \frac{\exp(z_i^+ \cdot T(x_i))}{\sum_{z_k \in A(i) \cup C} \exp(z_k \cdot T(x_i))} \\ p_c^+ = \frac{\exp(c_y \cdot T(x_i))}{\sum_{z_k \in A(i) \cup C} \exp(z_k \cdot T(x_i))} \\ p_{sum}^+ = p_1^+ + p_2^+ + \dots + p_{K_{y_i}}^+ + p_c^+. \end{array} \right.$$

Then the parametric contrastive loss will be:

$$\mathcal{L}_i = \sum_{z_+ \in P(i) \cup \{c_y\}} -w(z_+) \log \frac{\exp(z_+ \cdot T(x_i))}{\sum_{z_k \in A(i) \cup C} \exp(z_k \cdot T(x_i))} \quad (13)$$

$$= - \left( \log p_c^+ + \alpha \cdot (\log p_1^+ + \log p_2^+ + \dots + \log p_{K_{y_i}}^+) \right). \quad (14)$$

For obtaining its optimal solution, we define the Lagrange multiplier form of  $\mathcal{L}_i$  as:

$$l = - \left( \log p_c^+ + \alpha \cdot (\log p_1^+ + \log p_2^+ + \dots + \log p_{K_{y_i}}^+) \right) + \lambda (p_1^+ + p_2^+ + \dots + p_{K_{y_i}}^+ + p_c^+ - p_{sum}^+), \quad (15)$$

where  $\lambda$  is the Lagrange multiplier. The first order conditions of Eq. (15) w.r.t.  $\lambda$ ,  $p_c^+$  and  $p_i^+$  can be written as follows:

$$\left\{ \begin{array}{l} \frac{\partial l}{\partial p_i^+} = -\frac{\alpha}{p_i^+} + \lambda = 0; \\ \frac{\partial l}{\partial p_c^+} = -\frac{1}{p_c^+} + \lambda = 0; \\ \frac{\partial l}{\partial \lambda} = p_1^+ + p_2^+ + \dots + p_{K_{y_i}}^+ + p_c^+ - p_{sum}^+ = 0. \end{array} \right. \quad (16)$$

From Eq. (16), the optimal solution for  $p_i^+$  and  $p_c^+$  will be  $\frac{\alpha p_{sum}^+}{1 + \alpha K_{y_i}}$  and  $\frac{p_{sum}^+}{1 + \alpha K_{y_i}}$  respectively. Note that  $p_{sum}^+ \in [0, 1]$ , with a specific  $p_{sum}^+$ , the minimal loss value of  $\mathcal{L}_i$  is:

$$\mathcal{L}_i = -\log \frac{p_{sum}^+}{1 + \alpha K_{y_i}} - \alpha K_{y_i} \log \frac{\alpha p_{sum}^+}{1 + \alpha K_{y_i}}. \quad (17)$$

Thus, when  $p_{sum}^+ = 1.0$ ,  $\mathcal{L}_i$  achieves minimum with the optimal value  $p_i^+ = \frac{\alpha}{1 + \alpha K_{y_i}}$ , which is the probability that two samples of the same class are a true positive pair, and the optimal value  $p_c^+ = \frac{1}{1 + \alpha K_{y_i}}$  which is the probability that a sample is closest to its corresponding center  $c_{y_i}$  among  $C$ .

### C. Gradient Derivation

In Section 3.4, we analyze PaCo loss under balanced setting, taking full ImageNet as an example. With  $P_{sup}$  increases from 0 to 0.71, the intensity of supervised contrastive loss will enlarge. Here we show that more samples will be pulled together with their corresponding centers when  $P_{sup}$  increases from 0 to 0.71 from the perspective of gradient derivation.

$$\frac{\partial \mathcal{L}}{\partial c_k} = \begin{cases} (\alpha K^* + 1)p_{c_k} x_i, & y_i \neq k; \\ \{(\alpha K^* + 1)p_{c_k} - 1\} x_i, & y_i = k. \end{cases} \quad (18)$$

It is worthy to note that when  $p_{c_k} \in (0, 0.71)$ , we have

$$\begin{cases} \frac{\partial \mathcal{L}}{\partial c_k} > 0, & y_i \neq k; \\ \frac{\partial \mathcal{L}}{\partial c_k} < 0, & y_i = k. \end{cases} \quad (19)$$

Eqs. (18) and (19) mean that as  $P_{sup}$  increases in training process, the probability that a sample is closest to its corresponding center will increase and the probability that a sample is closest to other centers will decrease. Thus, more and more samples will be pulled together with their right centers.

### D. More Experimental Results on Many-shot, Medium-shot, and Few-shot.

Table 9: Comprehensive results on ImageNet-LT with different backbone networks (ResNet-50, ResNeXt-50 & ResNeXt-101). Models are trained with RandAugment in 400 epochs. Inference time is calculated with a batch of 64 images on Nvidia GeForce 2080Ti GPU, Pytorch1.5, Python3.6.

| Backbone    | Method            | Inference time (ms) | Many | Medium | Few  | All  |
|-------------|-------------------|---------------------|------|--------|------|------|
| ResNet-50   | $\tau$ -normalize | 8.3                 | 65.0 | 52.2   | 32.3 | 54.5 |
|             | Balanced Softmax  | 8.3                 | 66.7 | 52.9   | 33.0 | 55.0 |
|             | PaCo              | 8.3                 | 65.0 | 55.7   | 38.2 | 57.0 |
| ResNeXt-50  | $\tau$ -normalize | 13.1                | 66.4 | 53.4   | 38.2 | 56.0 |
|             | Balanced Softmax  | 13.1                | 67.7 | 53.8   | 34.2 | 56.2 |
|             | PaCo              | 13.1                | 67.5 | 56.9   | 36.7 | 58.2 |
| ResNeXt-101 | $\tau$ -normalize | 25.0                | 69.0 | 55.1   | 36.9 | 57.9 |
|             | Balanced Softmax  | 25.0                | 69.2 | 55.8   | 36.3 | 58.0 |
|             | PaCo              | 25.0                | 68.2 | 58.7   | 41.0 | 60.0 |

Table 10: Comprehensive results on ImageNet-LT with RIDE. Models are trained with RandAugment in 400 epochs. Inference time is calculated with a batch of 64 images on Nvidia GeForce 2080Ti GPU, Pytorch1.5, Python3.6.

| Backbone    | Method    | Inference time (ms) | Many | Medium | Few  | All  |
|-------------|-----------|---------------------|------|--------|------|------|
| RIDEResNet  | 1 expert  | 8.2                 | 64.8 | 49.8   | 29.6 | 52.8 |
|             | 2 experts | 12.0                | 67.7 | 53.5   | 31.5 | 56.0 |
|             | 3 experts | 15.3                | 69.0 | 54.7   | 32.5 | 57.0 |
| RIDEResNeXt | 1 expert  | 13.0                | 67.2 | 49.0   | 28.1 | 53.2 |
|             | 2 experts | 19.0                | 70.4 | 52.6   | 30.3 | 56.4 |
|             | 3 experts | 26.0                | 71.8 | 53.9   | 32.0 | 57.8 |

Table 11: Comprehensive results on iNaturalist 2018 with ResNet-50 and ResNet-152. †represents the models are trained without RandAugment. Inference time is calculated with a batch of 64 images on Nvidia GeForce 2080Ti GPU, Pytorch1.5, Python3.6.

| Backbone    | Method            | Inference time (ms) | Many | Medium | Few  | All  |
|-------------|-------------------|---------------------|------|--------|------|------|
| ResNet-50   | $\tau$ -normalize | 8.3                 | 74.1 | 72.1   | 70.4 | 71.5 |
|             | Balanced Softmax  | 8.3                 | 72.3 | 72.6   | 71.7 | 71.8 |
|             | PaCo              | 8.3                 | 70.3 | 73.2   | 73.6 | 73.2 |
| ResNet-50 † | Balanced Softmax  | 8.3                 | 72.5 | 72.3   | 71.4 | 71.7 |
|             | PaCo              | 8.3                 | 69.5 | 73.4   | 73.0 | 73.0 |
| ResNet-152  | PaCo              | 20.1                | 75.0 | 75.5   | 74.7 | 75.2 |

Table 12: Comprehensive results on iNaturalist 2018 with RIDE. Models are trained with RandAugment in 400 epochs without knowledge distillation. Inference time is calculated with a batch of 64 images on Nvidia GeForce 2080Ti GPU, Pytorch1.5, Python3.6.

| Backbone   | Method    | Inference time (ms) | Many | Medium | Few  | All  |
|------------|-----------|---------------------|------|--------|------|------|
| RIDEResNet | 1 expert  | 8.2                 | 56.0 | 66.3   | 66.0 | 65.2 |
|            | 2 experts | 12.0                | 62.2 | 70.5   | 70.0 | 69.5 |
|            | 3 experts | 15.3                | 66.5 | 72.1   | 71.5 | 71.3 |

Table 13: Comparison with re-weighting baselines on ImageNet-LT with ResNet-50. The re-weighting strategy is applied to the supervised contrastive loss. Models are all trained without RandAugment.

| Method                         | Top-1 Accuracy |
|--------------------------------|----------------|
| CE                             | 48.4           |
| multi-task (CE+Re-weighting)   | 49.0           |
| multi-task (CE+Blance Softmax) | 48.6           |
| PaCo                           | 51.0           |

## E. Implementation details for Table 1

We train models with cross-entropy, parametric contrastive loss 400 epochs without RandAugment respectively. For supervised contrastive loss, following the original paper, we firstly train the model 400 epochs. Then we fix the backbone and train a linear classifier 400 epochs.

## F. Ablation Study

**Re-weighting in contrastive learning without center learning rebalance** Re-weighting is a classical method for dealing with imbalanced data. Here we directly apply the re-weighting method of Cui *et al.* [16] in contrastive learning to compare with PaCo. Moreover, Balanced softmax [38], as one state-of-the-art method for traditional cross-entropy in long-tailed recognition, is also applied to contrastive learning rebalance. The experimental results are summarized in Table 13. It is obvious PaCo significantly surpasses the two baselines.

**Rebalance in center learning** PaCo balances the contrastive learning (for moderating contrast among samples). However the center learning also needs to be balanced, which has been explored in [1, 25, 15, 20, 8, 41, 38, 28, 49, 14, 46, 18]. To compare with state-of-the-art methods in long-tailed recognition, we incorporate Balanced Softmax [38] into the center

Table 14: Comparison with re-weighting baselines that perform center learning rebalance on ImageNet-LT with ResNeXt-50. Models are all trained with RangAugment in 400 epochs.

| Method                                     | loss weight | Top-1 Accuracy |
|--------------------------------------------|-------------|----------------|
| multi-task (Balanced Softmax+Re-weighting) | 0.05        | 57.0           |
| multi-task (Balanced Softmax+Re-weighting) | 0.10        | 57.1           |
| multi-task (Balanced Softmax+Re-weighting) | 0.20        | 57.1           |
| multi-task (Balanced Softmax+Re-weighting) | 0.30        | 57.0           |
| multi-task (Balanced Softmax+Re-weighting) | 0.50        | 57.2           |
| multi-task (Balanced Softmax+Re-weighting) | 0.80        | 57.2           |
| multi-task (Balanced Softmax+Re-weighting) | 1.00        | 56.9           |
| PaCo                                       | -           | 58.2           |

learning. As shown in Table 14, after rebalance in center learning, PaCo boosts performance to 58.2%, surpassing baselines with a large margin.
